# Supplementary material
Source: PubMed Central journal article supplement (PMC5780198)
Supplement: NIHMS921094-supplement-1.pdf [file NIHMS921094-supplement-1.pdf]

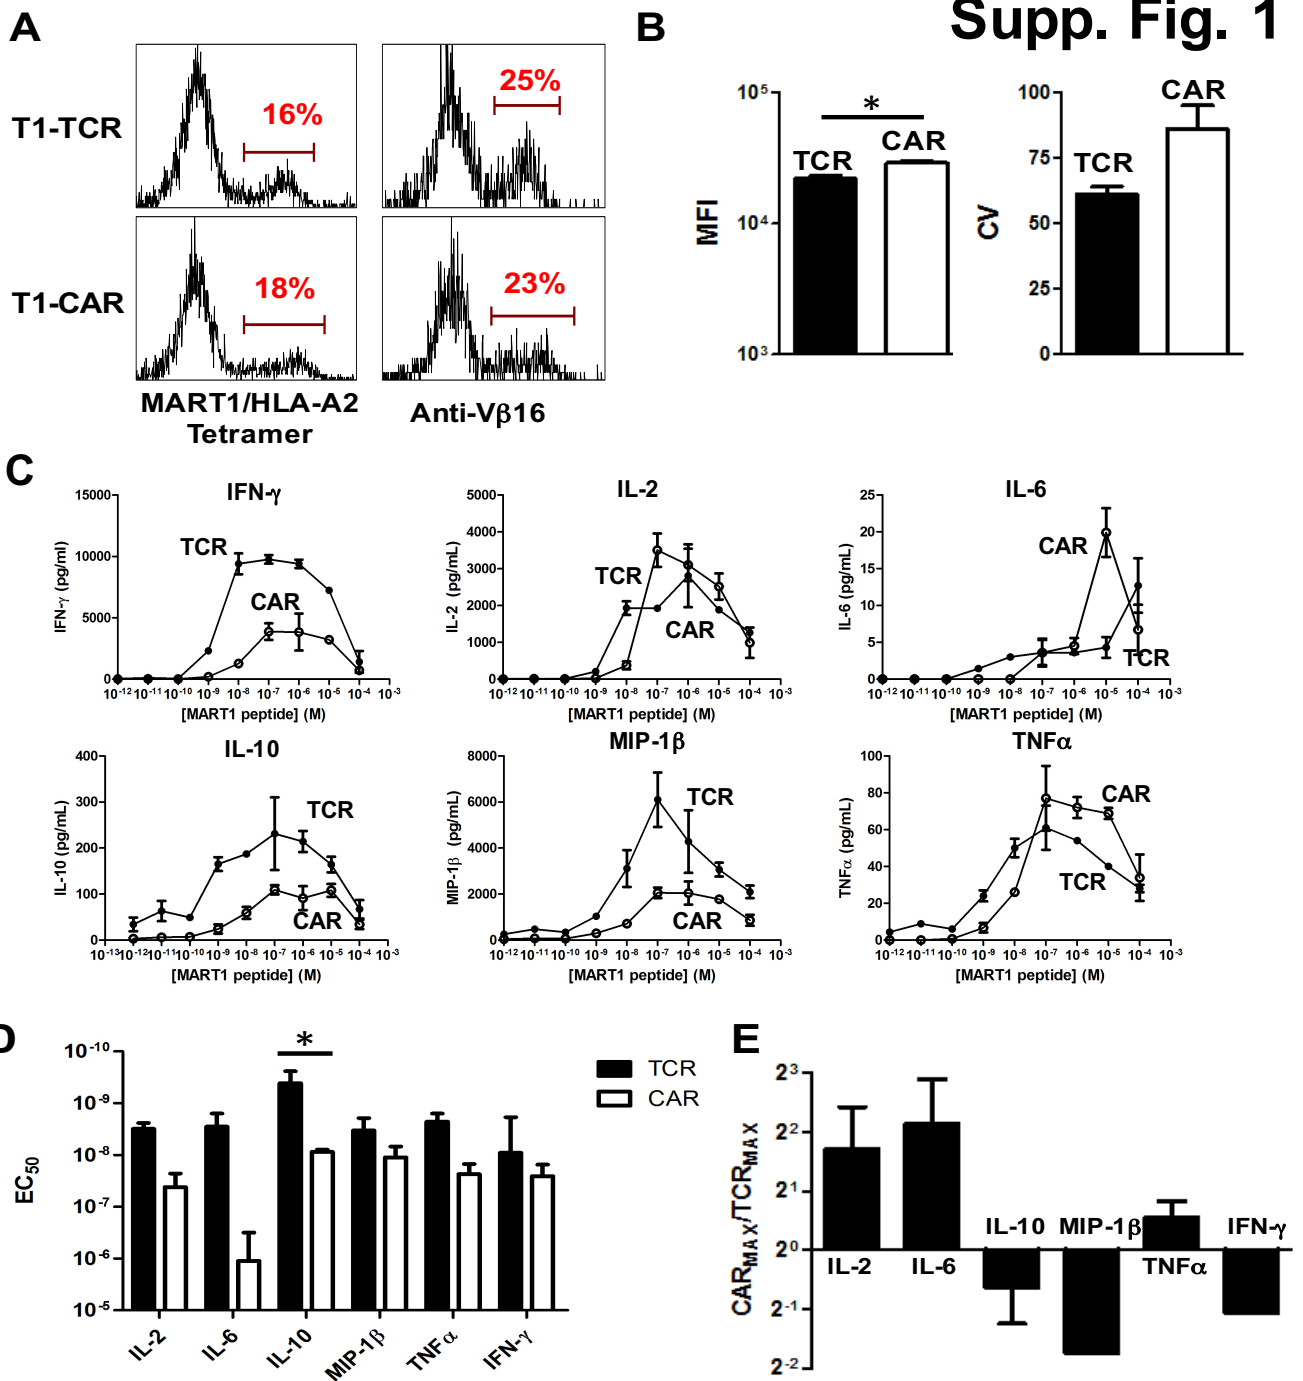

**Supp. Fig. 1- Flow cytometry and activity analysis of T1 TCR and CAR constructs transduced in primary CD4 T cells.** (A) CD4 T cells were isolated from AAD mice, activated *in vitro* with anti-CD3/CD28 beads, and transduced with T1 TCR and CAR constructs. Transduced cells were stained with 50 nM MART1/HLA-A2 tetramer and anti-Vb16 antibody. (B) The median fluorescence intensity (MFI) ( $n = 2$ ,  $p = 0.04$ ) and coefficient of variation (CV) values ( $n = 2$ ,  $p = 0.1$ ) were calculated for the TCR and CAR constructs in CD4 transduced cells. (C) CD4 T cells transduced with the T1 TCR and CAR were incubated in duplicate with T2 cells (HLA-A2<sup>+</sup>) at a 1:1 ratio and various concentrations of MART1 peptide. Supernatants were assayed for IFN-g, IL-2, IL-6, IL-10, MIP-1b and TNF $\alpha$ , concentrations were calculated using the Luminex Multiplex system. (D) EC<sub>50</sub> values from two experiments with CD4 T cells were calculated for each cytokine ( $p = 0.2$  (IL-2),  $p = 0.3$  (IL-6),  $p = 0.01$  (IL-10),  $p = 0.2$  (MIP-1b),  $p = 0.1$  (TNF $\alpha$ ),  $p = 0.3$  (IFN-g)). (E) The maximum concentration of each cytokine released for the CAR was calculated relative to the respective maximum concentration for the TCR ( $p = 0.9$  for IL-2 vs. IL-6,  $p = 0.7$  for IL-2 vs. IL-10,  $p = 0.9$  for IL-2 vs. TNF $\alpha$ ,  $p = 0.5$  for IL-6 vs. IL-10,  $p = 0.7$  for IL-6 vs. TNF $\alpha$ ,  $p = 0.9$  for IL-10 vs. TNF $\alpha$ ) For MIP-1b and IFN-g,  $n=1$  due to saturation at high ligand concentrations.

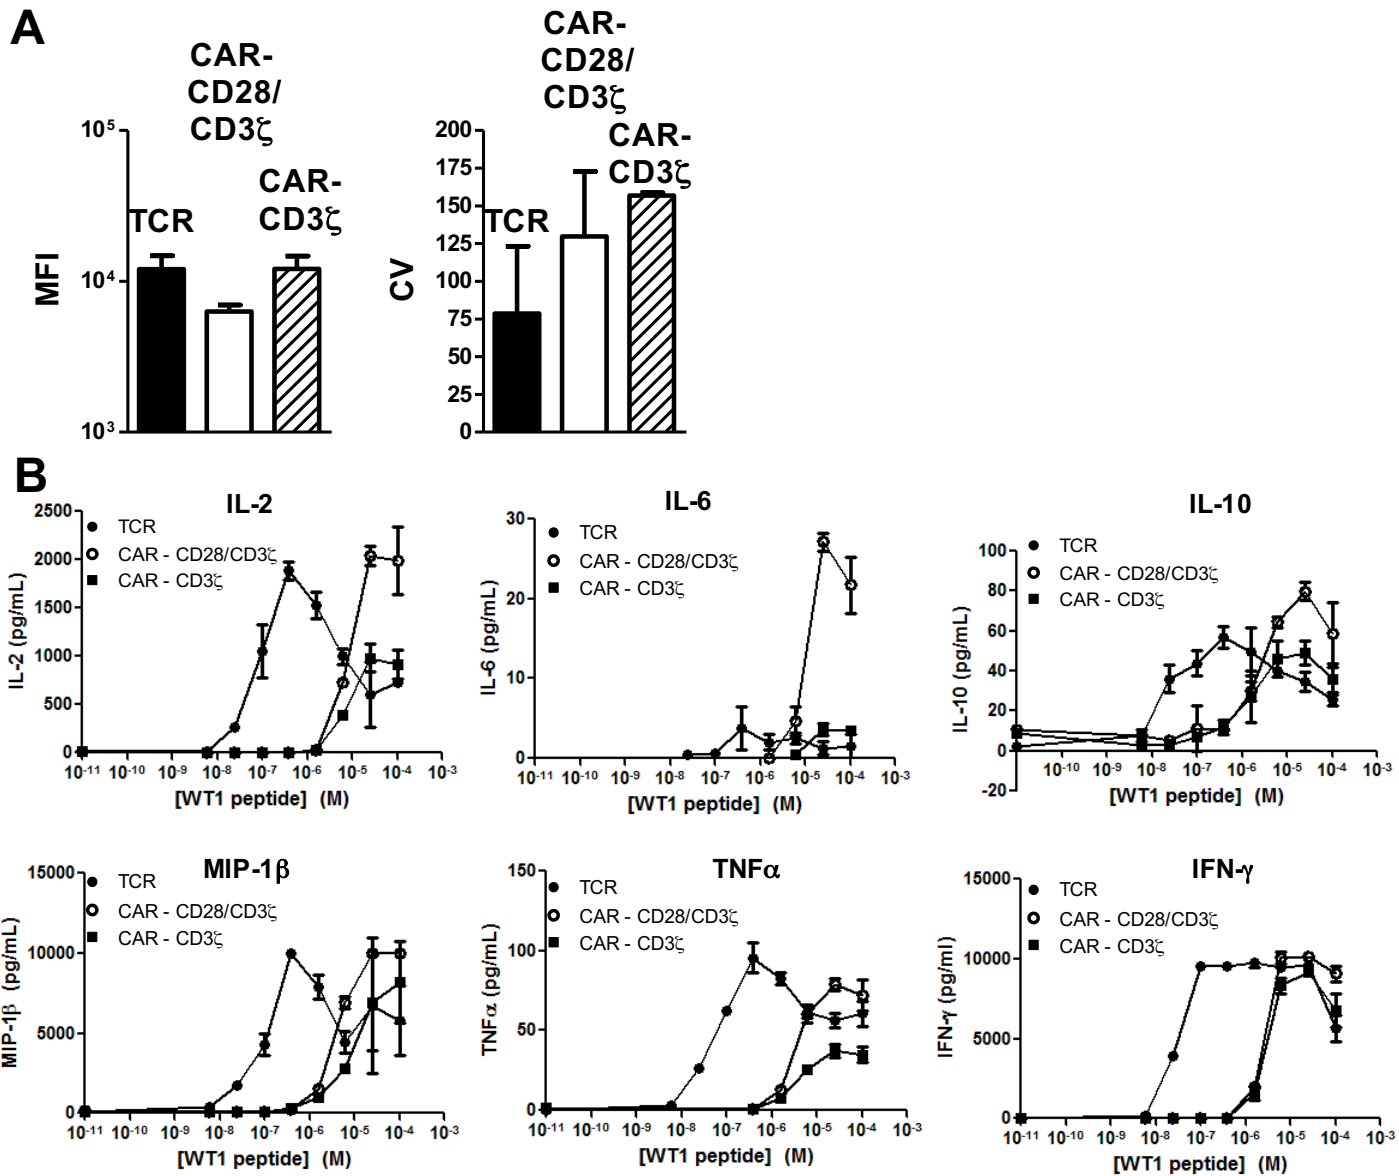

**Supp. Fig. 2- Flow cytometry and activity analysis of D13.1.1 TCR, CAR-CD28/CD3z and CAR-CD3z constructs transduced in primary CD4 AAD T cells.** CD4 T cells were isolated from AAD mice, activated *in vitro* with anti-CD3/CD28 beads, and transduced with D13.1.1 TCR, CAR-CD28/CD3z and CD3z CAR constructs. Transduced cells were stained with 50 nM WT1/HLA-A2 tetramer as shown in Fig. 5. Viable cells were gated based on a FSC vs. SSC plot. **(A)** The median fluorescence intensity (MFI) and coefficient of variation (CV) values were calculated for the TCR, CAR-CD28/CD3z and CAR-CD3z constructs in CD4 transduced cells (n=2, p = 0.3 for TCR vs. CAR-CD28/CD3z (MFI), p = 0.9 for TCR vs. CAR-CD3z (MFI), p = 0.3 for CAR-CD28/CD3z vs. CAR-CD3z (MFI), p = 0.6 for TCR vs. CAR-CD28/CD3z (CV), p 0.4 = for TCR vs. CAR-CD3z (CV), p = 0.9 for CAR-CD28/CD3z vs. CAR-CD3z (CV). **(B)** CD4 T cells transduced with the T1 TCR and CAR-CD28/CD3z were incubated in duplicate with T2 cells (HLA-A2<sup>+</sup>) at a 1:1 ratio and various concentrations of WT1 peptide. Supernatants were assayed for IFN-γ, IL-2, IL-6, IL-10, MIP-1b, TNFα, and IFN-γ concentrations using the Luminex Multiplex system. \* Indicates statistical significance (p < 0.05) determined using one-way ANOVA followed by Tukey's test (maximum cytokine ratios) in Prism 6. P values generated from Tukey's test are adjusted for multiple comparisons.
